# Supplementary material
Source: PubMed Central journal article supplement (PMC4212013)
Supplement: 14_101_Bach.Suppl.pdf [file 14_101_Bach.Suppl.pdf]

Supplemental Data

Chemokine (C-X-C Motif) Receptor 4 and Atypical Chemokine Receptor 3 Regulate Vascular  $\alpha_1$ -Adrenergic Receptor Function

Harold H Bach IV,<sup>1,2</sup> Yee M Wong,<sup>1</sup> Abhishek Tripathi,<sup>1</sup> Amanda M Nevins,<sup>3</sup> Richard L Gamelli,<sup>1</sup> Brian F Volkman,<sup>3</sup> Kenneth L Byron,<sup>2</sup> and Matthias Majetschak<sup>1,2</sup>

Online address: <http://www.molmed.org>

The Feinstein Institute for Medical Research North Shore LIJ  
Empowering Imagination. Pioneering Discovery.®

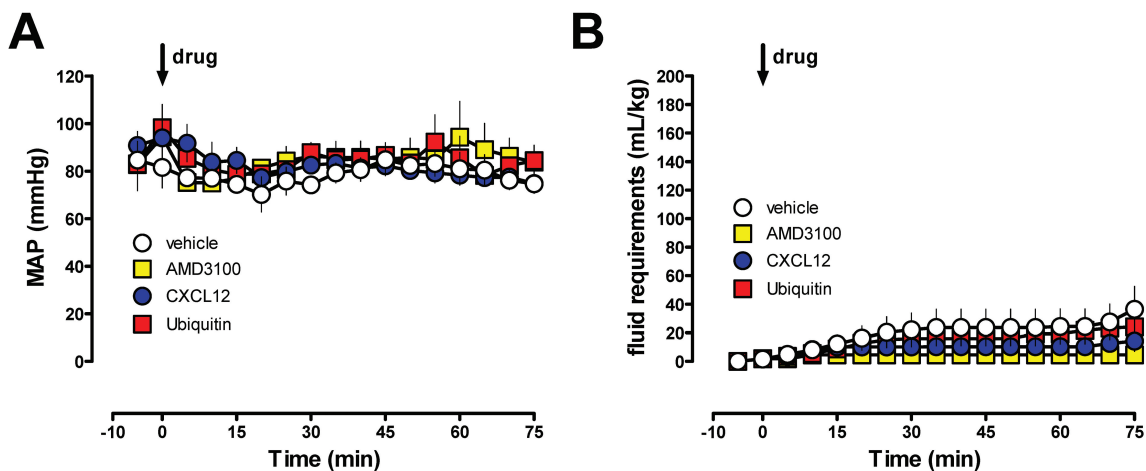

**Supplementary Figure S1.** The CXCR4/ACKR3 ligands CXCL12, AMD3100 and ubiquitin do not affect cardiovascular function in normal animals. Arrows indicate the time point of drug injection (350 nmol/kg), n=3-5/group. Open circles: vehicle. Yellow squares: AMD3100. Blue circles: CXCL12. Red squares: ubiquitin. (A) Mean arterial blood pressure (MAP; mmHg). (B) Cumulative fluid requirements to maintain MAP at 70 mmHg (mL/kg).
